# Supplementary material for: Expression, and Molecular and Enzymatic Characterization of Cu-Containing Nitrite Reductase from a Marine Ammonia-Oxidizing Gammaproteobacterium, Nitrosococcus oceani
Source: PubMed Central journal article supplement (PMC4103548; doi:10.1264/jsme2.me11310), 2012-04-28
Supplement: 27_407_s1.pdf [file 27_407_s1.pdf]

1 **Supplemental Fig. 1. Sequence alignment of Cu-containing nitrite reductases.** Amino acid  
2 sequence of the enzyme from *N. oceani* (Nco) is aligned with those from *A. xylooxidans* (Axy), *B.*  
3 *japonicum* (Bja), *A. cycloclastes* (Acy), *A. faecalis* (Afa), *N. gonorrhoeae* (Ngo), *B. pseudomallei*  
4 (Bps), *F. oxysporum* (Fox), *A. oryzae* (Aor), *H. marismortui* (Hma), *H. volcanii* (Hvo), *N. europaea*  
5 (Neu), and *N. maritimus* (Nma). Amino acids are numbered at the right margin. Putative Cu-binding  
6 residues for type 1 and type 2 Cu are indicated by I and II, respectively. Insertions and deletions of  
7 the sequence that are common in the class 1 or class 2 enzymes are boxed. Accession numbers of  
8 the sequences are indicated in Figure 1.

9



|     |                                                                          |        |     |
|-----|--------------------------------------------------------------------------|--------|-----|
|     |                                                                          | II I I |     |
| Noc | LRFKADKAGTYVYHCAPGGL-MTPYHVVSGMYGAIMIFPKKGLRDQNGKKVYTDKAYYVGEQGWYIPKDK   |        | 218 |
| Axy | LRFKADRSGLTFVYHCAPEG--MVPWHVVGMSGTLMLVLRDGLKDPQGKPLRYDRAYTIGFEDLYIPKDA   |        | 207 |
| Bja | LRWKATKTGVFVYHCAPGGP-MIPWHVVSQMGAVMVLPRDGLNDGKGHALKYDKVYVYVGEQDMYVPRDE   |        | 211 |
| Acy | LRFKATKPGVFVYHCAPEG--MVPWHVVSQMGAIMVLRDGLKDEKQPLTYDKIYVYVGEQDFYVPKDE     |        | 226 |
| Afa | LRFKATKPGVFVYHCAPPG--MVPWHVVSQMGAIMVLRDGLHDKGKALTYDKIYVYVGEQDFYVPRDE     |        | 225 |
| Ngo | FSFKALQPLGIYIYHCAVAP---VGMHIANGMYGLILVEPK-----EGLPKVDKEFYIVQGDFYTK---    |        | 217 |
| Bps | FTFKALNEGLFVYHCAVAP---VGMHVANGMYGLILVEPP-----EGLPKVDREYVVMQGFYTN---      |        | 209 |
| Fox | GRFKLLYPGLVYVYHCAAAP---VPVHIANGMYGLMYVQPEG-----NDLPPVDKEYVVMQSEFYHEPPE   |        | 340 |
| Aor | ARFRLQNPGLYIYHCAVGP---VGVHIANGMYGLLYVQPE-----QDLPPVDKEYVVMQSEFYHEPPE     |        | 297 |
| Hma | FRFKATYPGAFIYHCAVFN---LDMHISSGMFGMILVEPK-----EGLPEVDHEFYFGQHELTYT---     |        | 216 |
| Hvo | LRFKATYPGAYIYHCAVFN---MDMHISSGMFGMILVEPP-----EGMPEVDHEIYLQHELTYT---      |        | 210 |
| Neu | YTFTADNPGVFFYHCGSDP---MICHIAARGMYGVIVDPKD-----ANALPKADREYVLIQAEHYEN---   |        | 167 |
| Nma | YCYIAESAGMFKYHCSGVKLIQMDCHVLSQMYGITIVDPANG--YKLMVEKTSVSGELDRKFDADALE     |        | 226 |
| Noc | NGKYKRYANAIEPYGDTLEVMRGLVPTHTVYNGSKGALTG-----                            |        | 258 |
| Axy | NGKYKDYPTLAESYGDVAVMRTLTPSHIVFNGKVGALTG-----                             |        | 247 |
| Bja | KGNFKSYDSPGEAFTDTEEMMKLIPSHVFNKVGALTG-----                               |        | 251 |
| Acy | AGNYKKYETPGEAYEDAVKAMRTLTPTHIVFNGAVGALTG-----                            |        | 266 |
| Afa | NGKYKYEAPGDAYEDTVKMRTLTPTHVFNKVGALTG-----                                |        | 265 |
| Ngo | -----GKKGAQGLQPFDMDKAVAEQPEYVVFNGHVGAIAAG-----                           |        | 252 |
| Bps | -----GKYREKGLQSFDMDKAIDERPTYVFNKVGALTG-----                              |        | 244 |
| Fox | ---VDDGRRSEIVEFSYPNGLREEPQVAVFNKSESALTR-----                             |        | 377 |
| Aor | ---PDDNGQMSSTVEFSWPHALREAADVVFNKSEAAALT-----                             |        | 333 |
| Hma | -----GDTGEGHHDFFDEAMAAEPTVYVLMNGEKYAITPDRH-----                          |        | 254 |
| Hvo | -----KDAGEEGQHAFDYEAMRNEEPTVYVLMNGEKYAWTPNGR-----                        |        | 248 |
| Neu | -----PDDKTAMMKNKWSNVVFNKGGVFKYDPVHDS-----EA                              |        | 199 |
| Nma | FQLQYVQLYLTPEGNYDAGAMFKHONTATVFNKMGQFQVYVPMMAHLLVNGDVNKNIFVAQPWNGLEHKQY  |        | 296 |
| Noc | DNAMKAKVGDVSLVFIHS--QANEDSRIHLIGGHGDLVWPGGSFKNTMPVMDKETWHVNGGESVAALYTFKQ |        | 326 |
| Axy | ANALTAKVGETVLLIHS--QANRDTRPHLIGGHGDVWVETGKFNPPQKDLQETWIFIRGGSAGAALYTFKQ  |        | 315 |
| Bja | KNALTANVGENVLIVHS--QANRDSRPHLIGGHGDYVWETGKFGNAPEVGLQETWIFIRGGSAGAAKYFMQ  |        | 319 |
| Acy | DHALTAAVGERVLVHS--QANRDTRPHLIGGHGDYVWATGKFRNPPDLQETWILIPGGTAGAAFYTFRQ    |        | 334 |
| Afa | DKAMTAAVGERVLIVHS--QANRDTRPHLIGGHGDYVWATGKFNTPDQETWIFIPGGTAGAAFYTFQQ     |        | 333 |
| Ngo | DNALKAKAGETVRMYVGNNGPMLVSSSFHVIGEIFDKVYVEGGKLINEN--VQSTIVPAGGSAIVEFKVDI  |        | 320 |
| Bps | ERAMRARTDETURLFVGNNGPMLVSSSFHVIGAVFDKVRADGSNVTQND--VQTTIPAGGAATIEFHTRV   |        | 312 |
| Fox | DHPLKAHVGDVDRIFFGNAGPNLTSSSFHIGTHFKNVYRDGGVTSNPSKGIQTVSVPCGGSTIVDLKMAV   |        | 447 |
| Aor | EKPLKATLDDTVRIFFGNAGPNLTSSSFHIGTCFNKYRDSVLSPPGQCQTVSVPPGGSTIVDMKVVV      |        | 403 |
| Hma | G-SPSMQVGETARVYFVTGGPNLSSSFHPIGSVWDEVWQQGSIAGPPNRYVQTTIPVKPGSCAIATLHAEV  |        | 323 |
| Hvo | GPAATVGLDETVRVYFVDGGPNLSSSFHPIGSVWETLYPEGSLTTEPQTHIQTRQVPPGSTTIATMSSPV   |        | 318 |
| Neu | TSWLQAKPGERVRIYFVNAGPNELSSLHPIAGIWRVYPSGN-PKNVQYALQSYLIGAGDAATLDLISPV    |        | 268 |
| Nma | QSQLLFVENDQHURLFVENQNEPVFFHIVGEILDRVTQGNRVQSAAT---ETWLLGGSQGMIVDLVDFE    |        | 363 |
|     |                                                                          | II     |     |
| Noc | PGLYAYLHNLIAQAFMLGGAHVKVDGE-WNNDLMEQVVKPSPINAD.                          |        | 372 |
| Axy | PGVYAYLHNLIEAFELGAAGHIKVEGK-WNDDLKMKQIKAPGPIPR.                          |        | 360 |
| Bja | PGIYAYVHNLIEAADLGATAHFKVEGK-WNDDLMTQVKAPAEIPANTN.                        |        | 367 |
| Acy | PGVYAYVHNLIEAFELGAAGHFVKTGE-WNDDLMTSVVKPASM.                             |        | 377 |
| Afa | PGIYAYVHNLIEAFELGAAGHFVKTGE-WNDDLMTSVLAPSGT.                             |        | 376 |
| Ngo | PGNYTLVDHIFRAFNKALGQLKVEGA-ENPEIMTQKLSDTAYAGSAAAS(+22aa).                |        | 392 |
| Bps | PGNYTFVDHIFRAFNKALAILKVDGP-ENKAIYSGKELDAPYSG-DAVT(+159aa).               |        | 520 |
| Fox | PGTYTLVDHIFR-LDKGAVGFLNVSGP-QNPGVYQSSQPPRCVCGCKLHS.                      |        | 496 |
| Aor | PGTYTIVDHAIFR-LEKGAKGFLNVSGE-PRPMLYYSTLPPQCEGFNLKY(+107aa).              |        | 559 |
| Hma | PGPIKLVHSLSRVARKGTMAIINREGA-ANPDVFEPEA.                                  |        | 361 |
| Hvo | PGDFKLVHSLSRVVRKGCMAVVRAEGA-EDPEIFDPPDPQ.                                |        | 359 |
| Neu | EGANAIVDHSRHAHSGAIAVIMFTNDA-DPEARGENILIR.                                |        | 309 |
| Nma | PGAYAAVNHEDYAAIYTGAAVTFVAGDPFGLNPLVLEKGVIPAPVASAYAL(+56aa).              |        | 470 |
